# Supplementary material for: Cross-conjugation controls the stabilities and photophysical properties of heteroazoarene photoswitches
Source: Royal Society of Chemistry journal article supplement (doi:10.1039/d1ob02026a), 2021-12-28
Supplement: d1ob02026a1.pdf [file d1ob02026a1.pdf]

### Supporting Information for:

Cross-conjugation controls the stabilities and photophysical properties of heteroazoarene photoswitches

**Authors:** Daniel M. Adrion and Steven A. Lopez\*

Affiliation: Department of Chemistry and Chemical Biology, Northeastern University, Boston, Massachusetts, 02115, United States

**Corresponding author:** [s.lopez@northeastern.edu](mailto:s.lopez@northeastern.edu)

All Gaussian output files (*E* and *Z* reactants, transition structures, and TD-DFT vertical excitation energies) are available at [https://figshare.com/articles/dataset/Supporting\\_information\\_for\\_Cross-conjugation\\_controls\\_the\\_stabilities\\_and\\_photophysical\\_properties\\_of\\_heteroazoarene\\_photoswitches/16819165](https://figshare.com/articles/dataset/Supporting_information_for_Cross-conjugation_controls_the_stabilities_and_photophysical_properties_of_heteroazoarene_photoswitches/16819165)
